# Supplementary material
Source: PubMed Central journal article supplement (PMC10498333)
Supplement: jama-e2314685-s001.pdf [file jama-e2314685-s001.pdf]

1 **Randomised Evaluation of the iMpaCt of cathEter ablation on psychological Distress**  
2 **and neurocognitive function in Atrial fibrillation (The REMEDIAL study)**

3 **STUDY PROTOCOL**

4 **Background:**

5 Atrial fibrillation (AF) is the commonest sustained arrhythmia encountered in clinical  
6 practice (1) with increasing prevalence in the ageing population. Its incidence doubles from  
7 4% in individuals older than 60 years to 8% of persons older than 80 years and approximately  
8 25% of individuals aged 40 years and older will develop AF during their lifetime (2).

9 Although there is no survival advantage with rhythm control over rate control (3), literature  
10 supports that rhythm control improves AF symptoms and overall quality of life particularly  
11 in patients with substantial symptoms associated with AF (4, 5). Most clinical studies have  
12 focussed on the physical manifestations of AF when examining quality of life. However,  
13 recent data has demonstrated that patients with high burden of AF suffer from significant  
14 psychological distress. Indeed there was a surprisingly high and previously unreported  
15 incidence of suicidal ideation in this population. In an observational study we demonstrated  
16 an improvement in psychological distress and suicidal ideation in patients undergoing  
17 curative ablation compared with observational controls undergoing medical therapy.  
18 Outcomes were linked to AF burden.

19 While current AF guidelines recommend a symptoms-based approach in deciding the choice  
20 of management strategy, it is important to recognize severity of AF-related symptoms may be  
21 governed by markers of psychological distress such as anxiety and depression. Sears et al (6)  
22 showed that higher levels of reported negative emotions were more strongly associated with a  
23 greater number of reported AF symptoms. Depression and anxiety was thought to be more

24 important than number of AF episodes in predicting AF symptom severity. In a specific  
25 population with paroxysmal AF and an implantable cardioverter defibrillator (ICD) with  
26 atrial tachyarrhythmia therapies in situ, Camm et al (7) reported the number of device-  
27 counted and treated AF episodes to be one factor associated with symptom severity, and also  
28 found psychological distress to be a more powerful predictor of AF symptoms than any  
29 device-recorded objective measure of AF burden.

30 Several other aspects of personality style have also been associated with the subjective  
31 experience of AF. Ong et al (8) showed had more symptom preoccupation and severity of  
32 symptoms in patients with lower levels of optimism. Additionally, anxiety sensitivity was  
33 related to poorer health-related quality of life (HRQoL) and psychological distress. In a  
34 study by Lane et al (9) to determine how HRQoL, depression, and anxiety change over the  
35 first 12 months following diagnosis of AF, patients who perceived more stress at the time of  
36 diagnosis were noted to have a sharper decrease or a slower increase in state anxiety over the  
37 12 months. Perceived stress was also related significantly and positively to the slope of the  
38 mental health component, indicating that patients who perceived more stress in their lives at  
39 the time of diagnosis had a mental health QoL score that improved at a greater rate over the  
40 12-month follow-up period. Illness identity were significantly inversely correlated with the  
41 physical health slope over 12 months, suggesting that the more symptoms' patients attributed  
42 to their AF at time of diagnosis, the sharper the deterioration or the slower the improvement  
43 in physical health over the 12 months. Gehi et al (10) found that psychological comorbidities  
44 including depression, anxiety, and somatization are associated with worsened general health  
45 status and AF attributed symptom severity and that greater severity of depression and anxiety  
46 symptoms was associated with more frequent visits to seek medical attention for AF.

47 The effect of catheter ablation on quality of life and psychological distress has been evaluated  
48 in non-randomized studies. Sang et al (11), at 12- month follow up, of their cohort of  
49 paroxysmal AF showed significant reduction in depression and anxiety in 26.5% and 21.4%  
50 patients in the ablation group. They postulated that the improvement may have been from  
51 attainment of sinus rhythm which enabled them to be more physically active and  
52 subsequently regain a positive affective disposition and freedom from anti-arrhythmic drugs  
53 and anticoagulation and their consequent side effects. As discussed above we have also  
54 previously shown a significant improvement in psychological distress in patients undergoing  
55 AF ablation compared with a cohort having ongoing medical management. However, to date,  
56 there are no randomized studies comparing quality of life and impact on psychological  
57 distress between medical management and catheter ablation.

58 *Neurocognitive function and atrial fibrillation:*

59 The types and rates of complications that occur in patients undergoing radiofrequency  
60 catheter ablation (RFA) to prevent recurrent AF vary from series to series. The overall rate of  
61 major complications has been reported to be as high as 4 percent with vascular access  
62 complications being the most frequent (12) . The risk of stroke or TIA has been reported to  
63 occur in between 0.5 to 1.0% of patients (13). These events frequently arise from endocardial  
64 damage caused by ablation which may trigger thrombus formation despite use of  
65 anticoagulation.

66 Besides symptomatic embolic events, AF ablation also carries a risk of silent cerebral  
67 embolic lesions (SCE). Lickfett et al (14) first reported this in a small group of patients in  
68 their study by performing MRI before and after ablation. In a larger cohort Gaita et al (15)  
69 showed an incidence of 14% SCE on MRI scans post ablation compared to baseline imaging

70 pre procedure. In this study the ACT value maintained during the procedure strongly related  
Protocol Version 1, September 2017; HREC number: HREC/17/MH/347, Local HREC Number:  
2017.446

Royal Melbourne Hospital and Alfred Hospital

71 to the incidence of SCE: 9% of patients with an ACT > 250 reported SCE following the  
72 procedure compared to 17% within those maintaining lower ACT values. Since these initial  
73 studies, numerous further studies have been undertaken. The reported incidence of SCI in  
74 these studies was variable and dependent both on the degree of intra-procedural  
75 anticoagulation and the type of ablation technology being used. Irrigated catheters and the  
76 Cryoballoon have a lower incidence than solid electrode catheters (15). When the procedural  
77 ACT is maintained consistently above 300, the incidence of SCI with irrigated catheters or  
78 cryoablation is approximately 5-10%. However, with the solid tip catheter event rates were  
79 between 30-40%. These latter catheters are no longer in use.

80 While these lesions have been described as “silent”, pathology studies have demonstrated that  
81 they correspond to areas of endothelial and glial cell proliferation (16) and therefore may be  
82 associated with cognitive dysfunction. Thus, although the lesions disappear over time with  
83 repeated MRI imaging, they nevertheless are associated with pathological change. We have  
84 previously evaluated the prevalence of cognitive impairment after RFA in a study of 150  
85 patients (17). 60 patients were undergoing ablation for paroxysmal AF, 30 for persistent AF,  
86 30 for supraventricular tachycardia, and 30 matched AF patients awaiting RFA (the control  
87 group) all underwent eight neuropsychological tests at baseline and at 2 and 90 days after  
88 RFA. The prevalence of neurocognitive dysfunction at day 90 was 13, 20, 3, and 0 percent,  
89 respectively, indicating that AF ablation is associated with subtle neuro-cognitive decline.

90 On the other hand, it is also well recognised that AF itself is associated with various forms of  
91 dementia including both classical Alzheimer’s disease and also multi-infarct dementia. In a  
92 registry that included 90 patients with paroxysmal and 90 patients with persistent AF, as well  
93 as 90 matched controls (18), cognitive impairment was significantly greater in persistent and

94 paroxysmal AF patients compared to controls. Observational studies have suggested that  
95 catheter ablation may reduce the risk of cognitive decline in AF patients.

96 Thus, it is unclear where the balance of cognitive risk lies.

97 To date there are no randomised studies of neurocognitive function comparing changes over  
98 time in AF ablation versus medically managed patients.

99

#### 100 **Hypotheses:**

101 We hypothesise that:

102 1 There will be a high prevalence of psychological distress and suicidal ideation in a  
103 consecutive cohort of AF patients referred for management and consideration of catheter  
104 ablation.

105 2. That psychological distress relates to personality type.

106 3. That successful management of AF with catheter ablation will result in a significantly  
107 greater improvement in markers of psychological distress and neurocognitive function  
108 compared to ongoing medical management.

109

#### 110 **Methodology:**

111 A total of 100 patients with AF referred to the arrhythmia centre at Royal Melbourne  
112 Hospital and Alfred Hospital for further management will be enrolled. Participants will  
113 undergo sequential randomisation on a 1:1 basis between medical management and catheter  
114 ablation. Concealment of allocation will be achieved by using sequentially numbered, opaque  
Protocol Version 1, September 2017; HREC number: HREC/17/MH/347, Local HREC Number:  
2017.446  
Royal Melbourne Hospital and Alfred Hospital

115 sealed envelopes (SNOSE) scheme. The investigators will be blinded to the treatment  
116 allocation. The randomisation envelopes will be prepared by an independent statistician.

117 ***Inclusion criteria:***

- 118 • Paroxysmal and persistent AF cohort who have failed 1 antiarrhythmic drug and are  
119 eligible for at least 2 antiarrhythmic drugs.
- 120 • Age 18-80y
- 121 • Able to give valid consent

122 ***Exclusion criteria:***

- 123 • Severe valvular heart disease
- 124 • Patients treated for suicidal ideation
- 125 • Patients being treated for severe depression, anxiety or mood disorders
- 126 • Pre-existing neurological or clinically evident neurovascular condition
- 127 • Anticipated difficulty with neurocognitive assessment (deafness, language  
128 difficulties)
- 129 • Contraindication for systemic anticoagulation
- 130 • Patients who sustain a new cerebrovascular accident during study period
- 131 • Patients needing repeat ablations
- 132 • Rheumatic mitral valve disease
- 133 • Pregnancy

134 ***Baseline assessment:***

135 A. *Evaluation for potential exclusions and to allow accurate cohort assignment*

- 136           **a.** All patients enrolled will undergo thorough history and physical examination  
137                           at baseline to ensure they do not have any exclusion criteria. INR  
138                           (International Normalized Ratio) results will be recorded for patients who are  
139                           on warfarin to confirm therapeutic anticoagulation
- 140           **b.** Transthoracic echocardiogram: All patients a detailed echocardiogram will be  
141                           performed to assess LV systolic function and rule out significant valvulopathy  
142                           and strain variables of LA reservoir function. This study is clinically indicated  
143                           in all patients with cardiac arrhythmias.
- 144           **c.** Transesophageal echocardiogram: All patients will undergo a trans-  
145                           oesophageal echocardiogram pre-procedure to rule out left atrial clots which is  
146                           clinically indicated prior to AF ablation.

147

148        *B. Study specific assessments*

- 149
- a.**
- Validated tools for the assessment and quantification of both overall quality of
- 
- 150                           life and AF-specific quality of life will be administered in all patients:

- 151
- i.**
- SF-36 generic quality of life instrument:

152                                           SF-36 V2 consists of 36 items that assess eight health domains:  
153                                           physical functioning, role limitations because of physical  
154                                           problems, bodily pain, general health perception, vitality, social  
155                                           functioning, role limitations because of emotional problems and  
156                                           mental health. In addition to these eight subscales, physical  
157                                           component summary (PCS) and mental component summary  
158                                           (MCS) scores are also generated, which are normalised to an  
159                                           overall population mean of 50±10 (19). For all subscales,  
160                                           higher scores represent better functioning and QoL

161 **ii.** University of Toronto AF Severity Scale (AFSS):

162 The University of Toronto Atrial Fibrillation Severity Scale  
163 (AFSS) is a self-administered questionnaire that includes an  
164 instrument to measure the presence and severity of individual  
165 symptoms attributable to AF over a 4 week recall period, with 7  
166 individual symptoms quantified on a 5-point Likert scale and  
167 higher values reflecting more severe AF symptoms (AFSS  
168 Symptom Score)

169

170 **b.** Validated tools for the assessment and quantification of personality type and a  
171 chronic anxiety state will be administered:

172 **i.** Global Measure of Perceived Stress Scale (PSS)

173 The PSS measures the degree to which life situations are  
174 appraised as stressful. Each item is scored on a 5-point Likert  
175 scale from 0 to 4, with higher total scores indicating greater  
176 perceived stress. The Cronbach  $\alpha$  co-efficient of internal  
177 consistency is 0.85 and test-retest stability 0.85.

178 **ii.** Type D scale (DS-14)

179 The Type D personality denotes a high degree of negative  
180 affectivity and social inhibition in the underlying personality,  
181 and has been identified as a risk factor for adverse  
182 cardiovascular outcomes. It is a 14-item questionnaire, with  
183 each item scored between 0 and 4. Cronbach's  $\alpha$  co-efficient of  
184 internal consistency is between 0.86 and 0.88.



185

186 c. Validated tools for the assessment and quantification of symptoms of anxiety  
187 and depression will be administered:

188 i. Beck Depression Inventory Short Form (BDI-SF-13):

189 This score is performed in order to specifically identify  
190 participants reporting thoughts of self-harm. Based on  
191 participant responses to these questions, all those reporting  
192 suicidal ideation will be assessed and referred as appropriate  
193 for further management.

194 ii. Hospital Anxiety and Depression Scale (HADS)

195 This features 14 items specifically designed to evaluate  
196 symptoms of anxiety and depression in medical populations,  
197 with minimal influence from somatic symptoms that may  
198 falsely elevate the scores. Cronbach's  $\alpha$  for the full scale in  
199 cardiac patients is 0.89. Items are scored on a 4-point scale  
200 from 0 to 3, and an overall score provides a reflection of overall  
201 psychological distress, with a cutoff of  $\geq 15$  used to identify  
202 significant distress

203

204 d. All subjects will undergo neurological assessment at each study visit with the  
205 Mini-Mental State Exam (MMSE) and the National Institutes of Health (NIH)  
206 Stroke Scale.

207

208 e. Neuropsychological testing will comprise of 8 tests, based on the Canadian  
209 Study of Health and Aging, administered to all patients by a trained

210 interviewer (20). The results will be given as the number of correct answers or  
211 the time taken to complete the test. Testing will be administered at baseline,  
212 immediate post-procedure (within 24-48 hours) and at 3, 6, 9 and 12 months

213 These tests include the following:

- 214 *i.* The Consortium to Establish a Registry for Alzheimer's Disease  
215 (CERAD) Auditory Verbal Learning Test (Immediate and Delayed)  
216 requires patients to listen to a list of 10 words read to them by the  
217 examiner and then to immediately recall as many of those words as  
218 possible. This procedure is repeated three times with the same word  
219 list, with the order of word presentation changed on each occasion.  
220 After a 10-min delay filled with other cognitive tasks, patients must  
221 recall as many words from the word list as possible. The number of  
222 words recalled at this point is measured.
- 223 *ii.* Trail Making Task Part A requires patients to connect numbered  
224 circles in sequence as quickly as possible. The number of seconds  
225 required to complete the task is measured
- 226 *iii.* Trail Making Task Part B requires patients to connect a series of  
227 circles that contain a sequence of numbers and letters in the correct but  
228 alternating order (i.e., numeric and alphabetical). The number of  
229 seconds required to complete the task is measured
- 230 *iv.* Digit Symbol Substitution Test from the Wechsler Adult Intelligence  
231 Scale–Revised requires patients to reproduce on paper, within 90 s, as  
232 many coded symbols as possible in blank boxes beneath randomly  
233 generated digits, according to a coding scheme for pairing digits with

234 symbols. The number of boxes completed in 90 s is counted, and errors  
235 are deducted from this

236 v. Controlled Oral Word Association Test consists of presenting the  
237 patient with a letter and asking the patient to spontaneously generate as  
238 many words as possible for the given letter within 60 s. This task is  
239 repeated for three separate letters (F-A-S)

240 vi. CERAD Semantic Fluency Test requires patients to name as many  
241 words as possible from a predefined category (e.g., animals, clothing,  
242 first names) within 60 s. The number of words correctly named from  
243 the relevant category is measured

244 vii. Grooved Pegboard Test (Dominant Hand) requires patients to place 25  
245 keyed pegs in an array of holes with randomly oriented slots using only  
246 their dominant hand. The number of seconds required to complete the  
247 task is measured.

248 viii. Grooved Pegboard Test (Nondominant Hand) requires patients to place  
249 25 keyed pegs in an array of holes with randomly oriented slots using  
250 only their nondominant hand. The number of seconds required to  
251 complete the task is measured.

## 252 ***Follow-up***

253 All patients will be followed up at 3, 6, 9 and 12 months with all neuropsychological testing  
254 repeated during each visit. Trans-thoracic echocardiograms to quantify LA reservoir function  
255 will be performed at 6 and 12 months. Changes in anticoagulation and medication regimens  
256 will be recorded.

257 Rhythm and AF burden assessment: This will be performed either via continuous intracardiac  
258 monitoring (ICM) using an implantable loop recorder (Reveal LINQ™, Medtronic) or a pre-  
259 existing dual chamber device; or via twice daily monitoring with the KardiaMobile™  
260 (AliveCor, USA) ECG monitoring device. If none of these options was feasible, 24-hour  
261 holter monitoring was performed at 3, 6 and 12 months during follow up, and if symptoms  
262 occurred.

263 Outcomes measures:

264 Primary outcomes will include between group comparative analysis of:

- 265 1. Hospital Anxiety and Depression Scale (HADS) during follow up.
- 266 2. Cognitive ability as assessed by results of Trial Making tests A and B.
- 267 3. SF-36 score during follow up.

268 Secondary outcomes will include between group comparative analysis of:

- 269 1. Beck Depression Inventory score.
- 270 2. University of Toronto AF symptom severity Score.
- 271 3. Perceived Stress Scale Scores
- 272 4. Consortium to Establish Registry for Alzheimer's Disease (CERAD) Auditory Verbal  
273 Learning test.
- 274 5. CERAD Semantic Fluency Test
- 275 6. Grooved Peg Board Testing in Dominant Hand
- 276 7. Grooved Peg Board Testing on Non-Dominant Hand.
- 277 8. Symbol Digit Modalities Testing
- 278 9. Mini-mental State examination.

279 10. Left atrium reservoir function assessments on strain imaging and parameters on  
280 echocardiogram.

281 **Statistical analysis:**

282 Categorical variables will be reported as count and percentages, while continuous variables as  
283 mean and standard deviations (SD). Continuous outcomes at each endpoint can be analysed  
284 using a 2-sample t-test. However, a more comprehensive analysis of continuous outcomes,  
285 including additional explanatory variables will be based on a mixed linear model with the  
286 participant as the random factor and treatment, site and time as fixed factors. 95% confidence  
287 intervals (CI) will be reported. A p-value <0.05 will be considered significant. All analyses  
288 will be based on an intention-to-treat model.

289 Mean treatment differences between groups at baseline and at each follow-up period can be  
290 estimated from this model.

291 Based on our previous results from a non-randomised study looking psychological distress in  
292 patients with atrial fibrillation, the average HADS score (score range 0-21) was noted to be  
293 around 11 (in the abnormal range) in this cohort. A useful clinical effect of catheter ablation  
294 would be to reduce the mean HADS score to the normal range – the upper limit of which is 7.  
295 This corresponds to a mean difference of 4 points. Using this mean difference, and assuming  
296 a standard deviation of 5.5, in order for the study to reach a power of 80% with type 1 error  
297 of 5%, a minimum of 31 patients will have to be enrolled in each arm.

298 Sample size calculations were also considered for several other measures, using power of  
299 80% and type I error rate of 5%. These are shown below, with the assumptions about the  
300 means and standard deviation in each arm. In cases where the standard deviations differ  
301 between arms, the higher value was used for the sample size calculation.

302 Background data considered in sample size calculations are shown in the table below:

| Outcome measure                        | Untreated |      | Treated |      | Scale range | SD (either) |
|----------------------------------------|-----------|------|---------|------|-------------|-------------|
|                                        | Mean      | SD   | Mean    | SD   |             |             |
| AFSS (pilot study at Melbourne Health) | 9.7       | 1.0  | 2.2     | 1.8  | 0-35        |             |
| BDI <sup>(21)</sup>                    | 17        | 9.7  | 5.4     | 3    | 0-63        |             |
| SF-36 v2 (PCS) <sup>(22)</sup>         | 43.8      | 10.7 | 47.0    | 11.0 |             |             |
| SF-36 v2 (MCS) <sup>(22)</sup>         | 44.3      | 12.1 | 49.8    | 9.1  |             |             |
| Trail Making test A <sup>(23)</sup>    | 50.9      | 9.9  | 47.4    | 9.8  |             |             |
| Trail Making test B <sup>(23)</sup>    | 318.9     | 66.9 | 279.4   | 63.8 |             |             |

303

304 The table below shows the sample size calculated for each of the additional outcomes  
305 considered.

| Outcome measure        | Untreated<br>(means) | Treated<br>(means) | SD assumed in each<br>arm | Sample size<br>in each arm |
|------------------------|----------------------|--------------------|---------------------------|----------------------------|
| AFSS                   | 10                   | 3                  | 8.75                      | 26                         |
| BDI II                 | 20                   | 10                 | 7.5                       | 10                         |
| SF-36 v2 (PCS)         | 48                   | 54                 | 11                        | 54                         |
| SF-36 v2 (MCS)         | 44                   | 50                 | 10                        | 44                         |
| Trail Making Test<br>A | 51                   | 45                 | 9                         | 37                         |
| Trail Making Test<br>B | 320                  | 280                | 65                        | 43                         |

Protocol Version 1, September 2017; HREC number: HREC/17/MH/347, Local HREC Number: 2017.446

Royal Melbourne Hospital and Alfred Hospital

306 A sample size of 50 participants in each arm would be sufficient for all scores except for the  
307 subscale of SF-36 v2 where-in this sample size would be suitable for detecting an effect of  
308 the order of 7 points.

309

310 **Significance of proposal:**

311 The association between psychological distress and AF burden is strong. This study will  
312 provide insights into the clinical spectrum and predictors of psychological distress in patients  
313 with atrial fibrillation. This study will also be the first of its kind to assess in a randomised  
314 fashion the impact of catheter ablation in neurocognitive function of patients with atrial  
315 fibrillation follow up till one year. More importantly, we will able to assess the response and  
316 improvement of this distress with appropriate and timely management. Comparing  
317 improvement of quality of life between medical management and catheter ablation may be a  
318 genuine way of evaluating clinical outcomes. Traditional parameters, such as survival,  
319 healing or regression of disease, are not always sufficient ways to evaluate different  
320 treatments. The correlation between physical health and wellbeing can be rather weak.  
321 Considering this, there is an increasing demand to find new criteria to evaluate risks and  
322 advantages with new treatments focusing on the patient's subjective view. Should a  
323 significant improvement in HRQOL be with catheter ablation, it will help define priorities  
324 and arrange new care programs with limited waiting periods for these elective procedures.  
325 Because of the limited resources in health care, there is also a need for instruments that assess  
326 the effectiveness of various treatments.

327

328

329 **References:**

- 330 1. Ferrari R, Bertini M, Blomstrom-Lundqvist C, Dobrev D, Kirchhof P, Pappone C, et  
331 al. An update on atrial fibrillation in 2014: From pathophysiology to treatment. *Int J Cardiol.*  
332 2016;203:22-9.
- 333 2. Lloyd-Jones DM, Wang TJ, Leip EP, Larson MG, Levy D, Vasan RS, et al. Lifetime  
334 risk for development of atrial fibrillation: the Framingham Heart Study. *Circulation.*  
335 2004;110(9):1042-6.
- 336 3. Investigators TAFF-uIoRM. A Comparison of Rate Control and Rhythm Control in  
337 Patients with Atrial Fibrillation. *New England Journal of Medicine.* 2002;347(23):1825-33.
- 338 4. Hagens VE, Ranchor AV, Van Sonderen E, Bosker HA, Kamp O, Tijssen JGP, et al.  
339 Effect of rate or rhythm control on quality of life in persistent atrial fibrillation. Results from  
340 the Rate Control Versus Electrical Cardioversion (RACE) study. 2004;43(2):241-7.
- 341 5. Carnlof C IP, Pettersson PH, Jensen-Urstad M, Fossum B. Health-related quality of  
342 life in patients with atrial fibrillation undergoing pulmonary vein isolation, before and after  
343 treatment. *Eur J Cardiovasc Nurs.* 2010;9:45-9.
- 344 6. Sears SF, Serber ER, Alvarez LG, Schwartzman DS, Hoyt RH, Ujhelyi MR.  
345 Understanding Atrial Symptom Reports: Objective versus Subjective Predictors. *Pacing and*  
346 *Clinical Electrophysiology.* 2005;28(8):801-7.
- 347 7. Camm AJ, Sears SF, Todaro JF, Lewis TS, Sotile W, Conti JB. Examining the  
348 psychosocial impact of implantable cardioverter defibrillators: A literature review. *Clinical*  
349 *cardiology.* 1999;22(7):481-9.



- 350 8. Ong L, Cribbie R, Harris L, Dorian P, Newman D, Mangat I, et al. Psychological  
351 Correlates of Quality of Life in Atrial Fibrillation. *Quality of Life Research*.  
352 2006;15(8):1323-33.
- 353 9. Deirdre A. Lane CML, Gregory Y.H. Lip and Arie Nouwen. Illness perceptions,  
354 affective response, and health-related quality of life in patients with atrial fibrillation. *Journal*  
355 *of Psychosomatic Research*. 2009;66(3):203-10.
- 356 10. Gehi AK, Sears S, Goli N, Walker TJ, Chung E, Schwartz J, et al. Psychopathology  
357 and symptoms of atrial fibrillation: implications for therapy. *J Cardiovasc Electrophysiol*.  
358 2012;23(5):473-8.
- 359 11. Sang C-H, Chen K, Pang X-F, Dong J-Z, Du X, Ma H, et al. Depression, Anxiety, and  
360 Quality of Life After Catheter Ablation in Patients With Paroxysmal Atrial Fibrillation.  
361 *Clinical cardiology*. 2013;36(1):40-5.
- 362 12. Bertaglia EMD, Stabile GMD, Pappone AMD, Themistoclakis SMD, Tondo  
363 CMDPD, De Sanctis VMD, et al. Updated National Multicenter Registry on Procedural  
364 Safety of Catheter Ablation for Atrial Fibrillation. *Journal of cardiovascular*  
365 *electrophysiology*. 2013;24(10):1069-74.
- 366 13. Cappato R, Calkins H, Chen SA, Davies W, Iesaka Y, Kalman J, et al. Updated  
367 worldwide survey on the methods, efficacy, and safety of catheter ablation for human atrial  
368 fibrillation. *Circ Arrhythm Electrophysiol*. 2010;3(1):32-8.
- 369 14. Lickfett LMD, Hackenbroch MMD, Lewalter TMD, Selbach S, Schwab JOMD, Yang  
370 AMD, et al. Cerebral Diffusion-Weighted Magnetic Resonance Imaging: A Tool to Monitor

- 371 the Thrombogenicity of Left Atrial Catheter Ablation. *Journal of cardiovascular*  
372 *electrophysiology*. 2006;17(1):1-7.
- 373 15. Gaita F, Leclercq JF, Schumacher B, Scaglione M, Toso E, Halimi F, et al. Incidence  
374 of Silent Cerebral Thromboembolic Lesions After Atrial Fibrillation Ablation May Change  
375 According to Technology Used: Comparison of Irrigated Radiofrequency, Multipolar  
376 Nonirrigated Catheter and Cryoballoon. *Journal of cardiovascular electrophysiology*.  
377 2011;22(9):961-8.
- 378 16. Haines DE, Stewart MT, Barka ND, Kirchhof N, Lentz LR, Reinking NM, et al.  
379 Microembolism and Catheter Ablation II: Effects of Cerebral Microemboli Injection in a  
380 Canine Model. *Circulation: Arrhythmia and Electrophysiology*. 2012.
- 381 17. Medi C, Evered L, Silbert B, Teh A, Halloran K, Morton J, et al. Subtle Post-  
382 Procedural Cognitive Dysfunction After Atrial Fibrillation Ablation. *Journal of the American*  
383 *College of Cardiology*. 2013;62(6):531-9.
- 384 18. Gaita F, Corsinovi L, Anselmino M, Raimondo C, Pianelli M, Toso E, et al.  
385 Prevalence of Silent Cerebral Ischemia in Paroxysmal and Persistent Atrial Fibrillation and  
386 Correlation With Cognitive Function. *Journal of the American College of Cardiology*.  
387 2013;62(21):1990-7.
- 388 19. Grönefeld GC, Lilienthal J, Kuck K-H, Hohnloser SH. Impact of rate versus rhythm  
389 control on quality of life in patients with persistent atrial fibrillationResults from a  
390 prospective randomized study. *European Heart Journal*. 2003;24(15):1430-6.
- 391 20. Canadian study of health and aging: study methods and prevalence of dementia.  
392 *CMAJ* 1994;150:899-913.

- 393 21. Efremidis M, Letsas KP, Lioni L, Giannopoulos G, Korantzopoulos P, Vlachos K, et  
394 al. Association of Quality of Life, Anxiety, and Depression with Left Atrial Ablation  
395 Outcomes. *Pacing and Clinical Electrophysiology*. 2014;37(6):703-11.
- 396 22. Raine D, Langley P, Shepherd E, Lord S, Murray S, Murray A, et al. Effect of  
397 catheter ablation on quality of life in patients with atrial fibrillation and its correlation with  
398 arrhythmia outcome. *Open Heart*. 2015;2(1).
- 399 23. Efimova I, Efimova N, Chernov V, Popov S, Lishmanov Y. Ablation and Pacing:  
400 Improving Brain Perfusion and Cognitive Function in Patients with Atrial Fibrillation and  
401 Uncontrolled Ventricular Rates. *Pacing and Clinical Electrophysiology*. 2012;35(3):320-6.
- 402
