# Supplementary material
Source: PubMed Central journal article supplement (PMC10498333)
Supplement: jama-e2314685-s002.pdf [file jama-e2314685-s002.pdf]

## Supplemental Online Content

Al-Kaisey AM, Parameswaran R, Bryant C, et al. Atrial Fibrillation Catheter Ablation vs Medical Therapy and Psychological Distress. *JAMA*. Published online September 12, 2023. doi:10.1001/jama.2023.14685

eTable 1: Univariate and multivariate logistic regression analysis of predictors of severe psychological distress (defined after HADS > 15).

eTable 2: Monitoring strategy in the study cohort

eTable 3: Changes in the 8 subscales of the SF-36 in the Ablation and Medical arms between baseline and 12 months

eFigure 1: The Hospital Anxiety and Depression Scale (HADS)

This supplemental material has been provided by the authors to give readers additional information about their work.

**Supplemental Table 1: Univariate and multivariate logistic regression analysis of predictors of severe psychological distress (defined after HADS > 15) at baseline.**

|                                       | Reference | Baseline | Single explanatory variable models |                 | Multiple explanatory variable model |                 |
|---------------------------------------|-----------|----------|------------------------------------|-----------------|-------------------------------------|-----------------|
|                                       |           |          | Odds ratio<br>(95% CI)             | <i>P</i> -value | Odds ratio<br>(95% CI)              | <i>P</i> -value |
| Age in years                          | x+1       | x        | 1.01<br>(0.97, 1.04)               | 0.800           | 1.00<br>(0.95, 1.06)                | 0.954           |
| Gender                                | Male      | Female   | 0.79<br>(0.33, 1.94)               | 0.612           | 0.30<br>(0.07, 1.25)                | 0.099           |
| Persistent AF                         | No        | Yes      | 0.68<br>(0.29, 1.60)               | 0.379           |                                     |                 |
| BMI                                   | x+1       | x        | 1.04<br>(0.93,1.11)                | 0.242           |                                     |                 |
| CHADS <sub>2</sub> VA <sub>2</sub> Sc | x+1       | x        | 0.98<br>(0.74,1.30)                | 0.871           |                                     |                 |
| AFSSS                                 | x+1       | x        | 1.12<br>(1.05,1.20)                | 0.001           | 1.12<br>(1.04, 1.21)                | 0.004           |
| Personality D type                    | No        | Yes      | 0.13<br>(0.05, 0.34)               | <0.001          | 0.10<br>(0.03, 0.33)                | <0.001          |

BMI: Body mass index; AFSSS: Atrial Fibrillation Symptom Severity Score; HADS: Hospital Anxiety and Depression Score.

**Supplemental table 2: Monitoring strategy in the study cohort**

|                                | Ablation (n = 49) | Medical (n = 47) |
|--------------------------------|-------------------|------------------|
| AliveCor (%)                   | 28 (57)           | 30 (63)          |
| Intracardiac Monitoring (%)    | 14 (29)           | 11 (23)          |
| I. Loop Recorder (%)           | 11 (23)           | 11 (23)          |
| II. Dual Chamber Device (%)    | 3 (6)             | 0 (0)            |
| Periodic Holter Monitoring (%) | 7 (14)            | 6 (14)           |

Pearson's chi-square test of association between monitoring type and treatment group:  $\chi^2 = 3.11$ ,  $df = 3$ ,  $P = 0.376$ .

**Supplemental Table 3: Changes in the 8 subscales of the SF-36 in the Ablation and Medical arms between baseline and 12 months.**

|                  |                     | Ablation arm (N=49) | Medical arm (N=47) | Ablation minus Medical @12 months |              |         |
|------------------|---------------------|---------------------|--------------------|-----------------------------------|--------------|---------|
|                  |                     | Ablation arm (N=49) | Medical arm (N=47) | Mean                              | 95% CI       | P-value |
| <b>Baseline</b>  | General Health      | 53.13 (18.42)       | 56.22 (20.23)      |                                   |              |         |
|                  | Role – Physical     | 50.43 (24.71)       | 57.38 (24.92)      |                                   |              |         |
|                  | Role – Emotional    | 69.22 (22.34)       | 68.55 (27.44)      |                                   |              |         |
|                  | Vitality            | 40.20 (22.15)       | 41.53 (20.77)      |                                   |              |         |
|                  | Emotional Wellbeing | 71.97 (16.37)       | 64.66 (19.52)      |                                   |              |         |
|                  | Social Function     | 59.40 (32.81)       | 58.44 (26.68)      |                                   |              |         |
|                  | Pain                | 70.52 (18.04)       | 58.22 (20.83)      |                                   |              |         |
|                  | Physical Function   | 59.68 (24.39)       | 58.55 (25.26)      |                                   |              |         |
| <b>12 Months</b> | General Health      | 62.25 (22.13)       | 59.17 (23.21)      | 3.08                              | -6.88, 13.05 | 0.540   |
|                  | Role – Physical     | 70.49 (31.79)       | 55.65 (29.01)      | 14.84                             | 1.71, 27.97  | 0.027   |
|                  | Role – Emotional    | 85.85 (22.68)       | 62.70 (32.42)      | 23.15                             | 11.03, 35.27 | < 0.001 |
|                  | Vitality            | 54.07 (20.09)       | 39.58 (23.82)      | 14.49                             | 4.97, 24.01  | 0.003   |
|                  | Emotional Wellbeing | 74.65 (19.59)       | 70.10 (21.55)      | 4.56                              | -4.34, 13.45 | 0.311   |
|                  | Social Function     | 80.23 (28.25)       | 62.20 (25.97)      | 18.03                             | 6.33, 29.73  | 0.003   |
|                  | Pain                | 70.97 (22.88)       | 67.62 (32.16)      | 3.35                              | -8.74, 15.43 | 0.583   |
|                  | Physical Function   | 71.74 (24.71)       | 61.67 (30.20)      | 10.08                             | -1.85, 22.00 | 0.097   |



Supplemental Figure 1

Hospital Anxiety and Depression Scale (HADS)

Tick the box beside the reply that is closest to how you have been feeling in the past week.  
Don't take too long over you replies: your immediate is best.

| D | A |                                                                                     | D | A |                                                                              |
|---|---|-------------------------------------------------------------------------------------|---|---|------------------------------------------------------------------------------|
|   |   | <b>I feel tense or 'wound up':</b>                                                  |   |   | <b>I feel as if I am slowed down:</b>                                        |
| 3 |   | Most of the time                                                                    | 3 |   | Nearly all the time                                                          |
| 2 |   | A lot of the time                                                                   | 2 |   | Very often                                                                   |
| 1 |   | From time to time, occasionally                                                     | 1 |   | Sometimes                                                                    |
| 0 |   | Not at all                                                                          | 0 |   | Not at all                                                                   |
|   |   | <b>I still enjoy the things I used to enjoy:</b>                                    |   |   | <b>I get a sort of frightened feeling like 'butterflies' in the stomach:</b> |
| 0 |   | Definitely as much                                                                  | 0 |   | Not at all                                                                   |
| 1 |   | Not quite so much                                                                   | 1 |   | Occasionally                                                                 |
| 2 |   | Only a little                                                                       | 2 |   | Quite Often                                                                  |
| 3 |   | Hardly at all                                                                       | 3 |   | Very Often                                                                   |
|   |   | <b>I get a sort of frightened feeling as if something awful is about to happen:</b> |   |   | <b>I have lost interest in my appearance:</b>                                |
| 3 |   | Very definitely and quite badly                                                     | 3 |   | Definitely                                                                   |
| 2 |   | Yes, but not too badly                                                              | 2 |   | I don't take as much care as I should                                        |
| 1 |   | A little, but it doesn't worry me                                                   | 1 |   | I may not take quite as much care                                            |
| 0 |   | Not at all                                                                          | 0 |   | I take just as much care as ever                                             |
|   |   | <b>I can laugh and see the funny side of things:</b>                                |   |   | <b>I feel restless as I have to be on the move:</b>                          |
| 0 |   | As much as I always could                                                           | 3 |   | Very much indeed                                                             |
| 1 |   | Not quite so much now                                                               | 2 |   | Quite a lot                                                                  |
| 2 |   | Definitely not so much now                                                          | 1 |   | Not very much                                                                |
| 3 |   | Not at all                                                                          | 0 |   | Not at all                                                                   |
|   |   | <b>Worrying thoughts go through my mind:</b>                                        |   |   | <b>I look forward with enjoyment to things:</b>                              |
| 3 |   | A great deal of the time                                                            | 0 |   | As much as I ever did                                                        |
| 2 |   | A lot of the time                                                                   | 1 |   | Rather less than I used to                                                   |
| 1 |   | From time to time, but not too often                                                | 2 |   | Definitely less than I used to                                               |
| 0 |   | Only occasionally                                                                   | 3 |   | Hardly at all                                                                |
|   |   | <b>I feel cheerful:</b>                                                             |   |   | <b>I get sudden feelings of panic:</b>                                       |
| 3 |   | Not at all                                                                          | 3 |   | Very often indeed                                                            |
| 2 |   | Not often                                                                           | 2 |   | Quite often                                                                  |
| 1 |   | Sometimes                                                                           | 1 |   | Not very often                                                               |
| 0 |   | Most of the time                                                                    | 0 |   | Not at all                                                                   |
|   |   | <b>I can sit at ease and feel relaxed:</b>                                          |   |   | <b>I can enjoy a good book or radio or TV program:</b>                       |
| 0 |   | Definitely                                                                          | 0 |   | Often                                                                        |
| 1 |   | Usually                                                                             | 1 |   | Sometimes                                                                    |
| 2 |   | Not Often                                                                           | 2 |   | Not often                                                                    |
| 3 |   | Not at all                                                                          | 3 |   | Very seldom                                                                  |

Please check you have answered all the questions

Scoring:

Total score: Depression (D) \_\_\_\_\_ Anxiety (A) \_\_\_\_\_

0-7 = Normal

8-10 = Borderline abnormal (borderline case)

11-21 = Abnormal (case)
