# Supplementary material
Source: PubMed Central journal article supplement (PMC10498333)
Supplement: jama-e2314685-s003.pdf [file jama-e2314685-s003.pdf]

## **Data Sharing Statement**

### **Data**

**Data available:** No
